# Supplementary material
Source: publisher figshare collection journal article supplement (https://asha.figshare.com/articles/dataset/_/15167355)
Supplement: Supplementary file 1 [file 1]

## Supplemental Material S2. Preparation process.

### 1) Raw output of the ASR transcript as a text file:

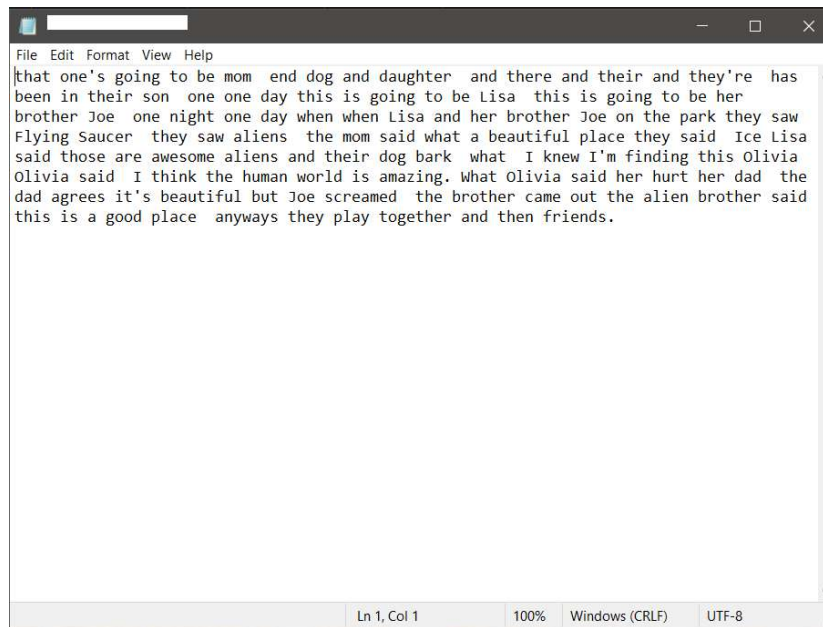

### 2) Segment transcript at clause-level, matching the reference corpus. Place files side-by-side on monitor for easier comparison. In the example below, the places where punctuation was inserted is marked with a red slash.

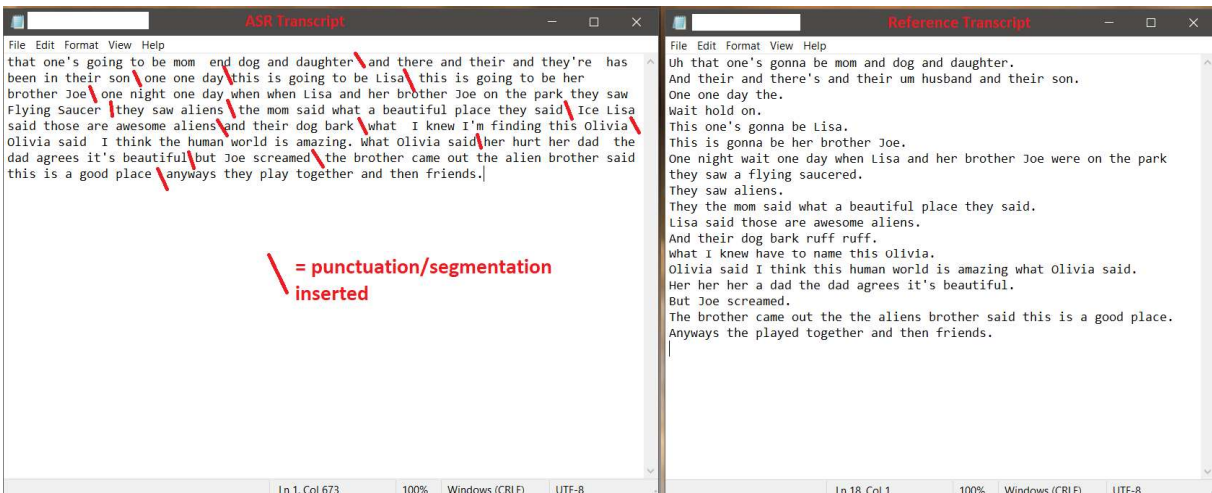

- 3) Separate clauses into different lines. Identify missing utterances and insert "X" as placeholder, such that the ASR/RTT transcript has the same number of lines as the reference transcript. This is very important for aligning transcripts so WER can be calculated (the function in R will actually not run if they are misaligned).

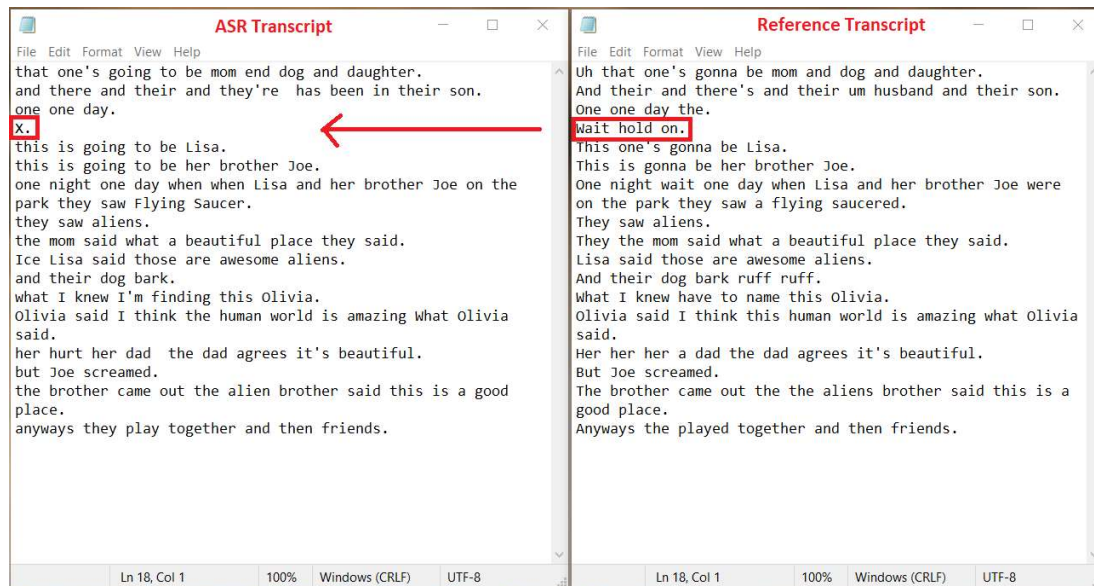

- 4) Check for spelling variants on proper nouns (in this case there were none) and adjust to match reference corpus. Capitalization differences do not matter, since all characters will be set to lowercase in R.
- 5) These same steps were utilized for the RTT Transcripts.
