# Supplementary material
Source: publisher figshare collection journal article supplement (https://asha.figshare.com/articles/dataset/_/15167355)
Supplement: Supplementary file 2 [file 1]

### **Supplemental Material S1.** Example prepared transcripts from each source.

This transcript was selected as it has a speech rate that falls within 1 SD of the average (WPM = 82.6), and the WER<sub>w</sub> of each transcription method falls within 1 SD of the respective average WER<sub>w</sub> for that method.

#### **Reference Transcript**

Uh that one's gonna be mom and dog and daughter.  
And their and there's and their um husband and their son.  
One one day the.  
Wait hold on.  
This one's gonna be Lisa.  
This is gonna be her brother Joe.  
One night wait one day when Lisa and her brother Joe were on the  
park they saw a flying saucered.  
They saw aliens.  
They the mom said what a beautiful place they said.  
Lisa said those are awesome aliens.  
And their dog bark ruff ruff.  
What I knew have to name this Olivia.  
Olivia said I think this human world is amazing what Olivia  
said.  
Her her her a dad the dad agrees it's beautiful.  
But Joe screamed.  
The brother came out the the aliens brother said this is a good  
place.  
Anyways the played together and then friends.

#### **Google Cloud Speech ASR, WER<sub>w</sub> = 31.4%**

That one's going to be mom end dog and daughter.  
And there and their and they're has been in their son.  
One one day.  
X.  
This is going to be Lisa.  
This is going to be her brother Joe.  
One night one day when when Lisa and her brother Joe on the park  
They saw Flying Saucer.  
They saw aliens.  
The mom said what a beautiful place they said.  
Ice Lisa said those are awesome aliens.  
And their dog bark.  
What I knew I'm finding this Olivia.  
Olivia said I think the human world is amazing What Olivia said.  
Her hurt her dad the dad agrees it's beautiful.  
But Joe screamed.

The brother came out the alien brother said this is a good place.

Anyways they play together and then friends.

**Real-Time Transcription – SLP, WER<sub>w</sub> = 51.4%**

Uh that one's gonna be mom dog and daughter.

And their husband and their son.

One day.

Wait hold on.

This is gonna be Lisa.

And this is gonna be Joe.

One day when Lisa and Joe were on the farm.

They saw aliens.

Their mom said what a wonderful place.

X.

And the dog barked.

X.

This Olivia said I think this human world is amazing.

The dad agrees it's beautiful.

X.

Brother came out the alien brother said this is a good place.

Anyways they played together and became friends.

**Real-Time Transcription – TT, WER<sub>w</sub> = 49.3%**

That's one's gonna be mom and dog and daughter.

And their husband and their son.

One day.

X.

This is going to be Lisa.

This is going to be her brother joe.

One day when Lisa and her brother Joe were at the park they saw a flying saucer.

X.

Her mother said what a beautiful place.

Lisa said those are aliens.

And the dog barked bark.

X.

And Olivia said I think the human world is amazing.

The dad agrees it's beautiful.

But Joe screamed.

The brother came out the alien brother said this is a good place.

Anyway they play together and then friends.
