# Supplementary material
Source: publisher figshare collection journal article supplement (https://asha.figshare.com/articles/dataset/_/15167355)
Supplement: Supplementary file 3 [file 1]

**Supplemental Material S3.** Descriptives for SALT indices by transcription method.

| <b>SALT Index</b> | <b>Reference</b> | <b>ASR</b>   | <b>RTT<sub>SLP</sub> RTT<sub>TT</sub></b> |              |
|-------------------|------------------|--------------|-------------------------------------------|--------------|
| TNU               | 19.1 (8.4)       | 17.6 (7.7)   | 14.8 (4.9)                                | 14.3 (5.3)   |
| MLU—words         | 7.8 (1.7)        | 8.4 (1.8)    | 7.9 (1.4)                                 | 7.8 (1.3)    |
| NDW               | 71.1 (20.9)      | 79.9 (25.0)  | 62.9 (16.4)                               | 61.1 (17.3)  |
| NTW               | 136.0 (53.7)     | 142.2 (55.1) | 114.0 (38.1)                              | 108.8 (37.5) |

*Note.* TNU = total number of utterances, MLU = mean length of utterances, NDW = number of different words, NTW = number of total words.
